# Supplementary material for: A μ1,1- or μ1,3-carboxylate bridge makes the difference in the magnetic properties of dinuclear MnII compounds
Source: Royal Society of Chemistry journal article supplement (doi:10.1039/c0dt00902d), 2010-01-01

## Electronic Supplementary Information

**A  $\mu_{1,1}$ - or  $\mu_{1,3}$ -carboxylate bridge makes the difference in the magnetic properties of dinuclear  $\text{Mn}^{\text{II}}$  compounds†**

**Verónica Gómez<sup>a,\*</sup>, Montserrat Corbella<sup>a</sup>, Mercè Font-Bardia<sup>b</sup> and Teresa Calvet<sup>b</sup>**

**Fig. S1**  $\pi$ -stacking and C–H $\cdots\pi$  interactions between dinuclear units of compound **2**.

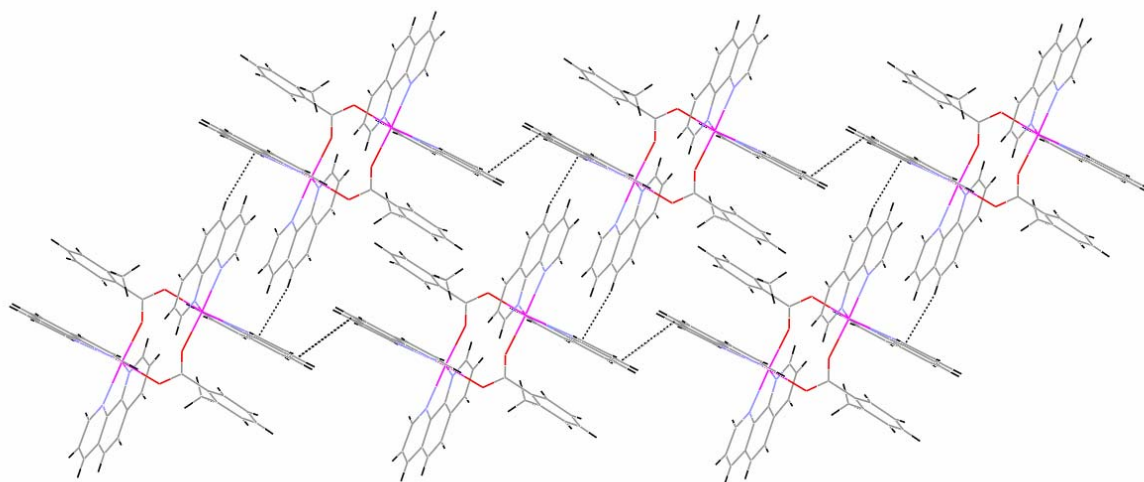

**Fig. S2**  $\pi$ -stacking and C–H $\cdots$ C–H interactions between dinuclear units of compound **4**.

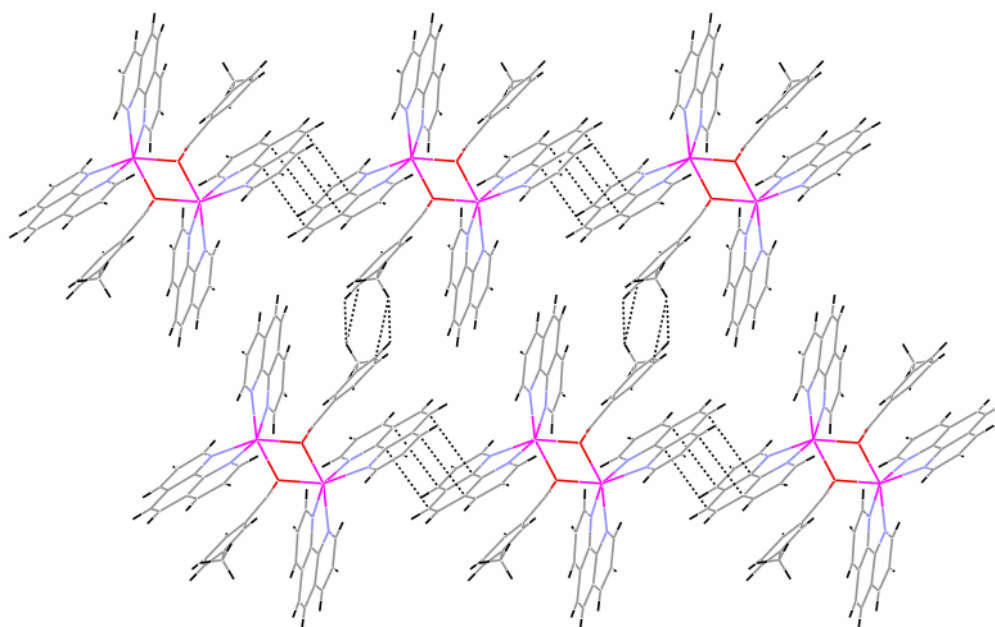

**Fig. S3** Interaction between perchlorate anions and dinuclear units in compound **6**.

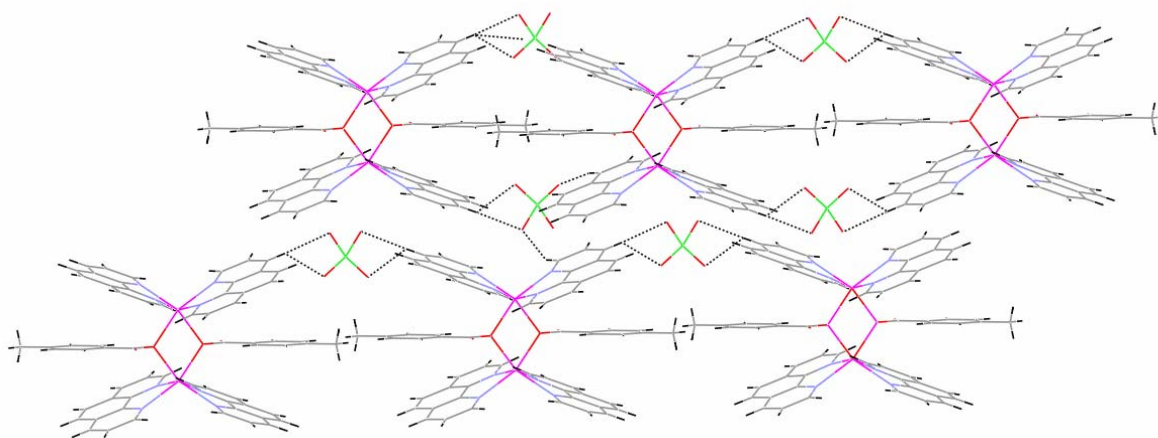

**Fig. S4** Mn–O<sub>b</sub>–Mn angle vs. Mn···Mn distance plot for compounds with planar (●) or non-planar (○) [Mn<sub>2</sub>(μ-O)<sub>2</sub>] core.

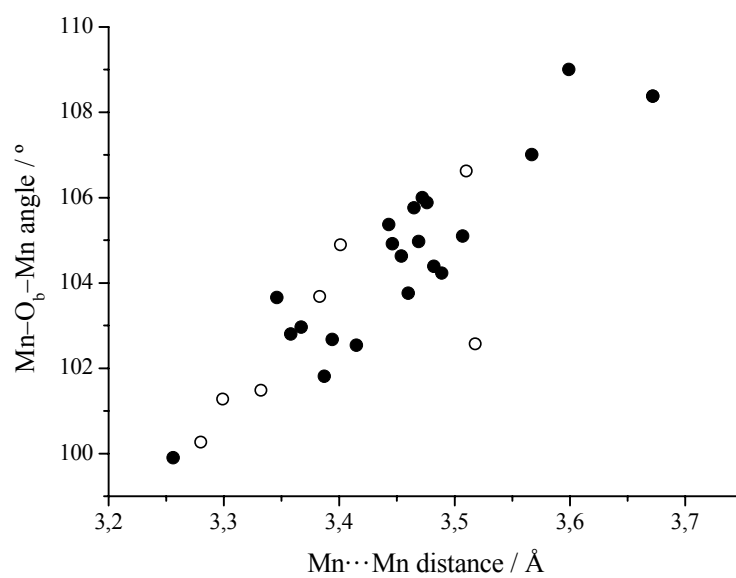

**Fig. S5** Mn–O<sub>b</sub> distance vs. Mn···Mn distance plot for compounds with planar (●) or non-planar (○) [Mn<sub>2</sub>(μ-O)<sub>2</sub>] core.

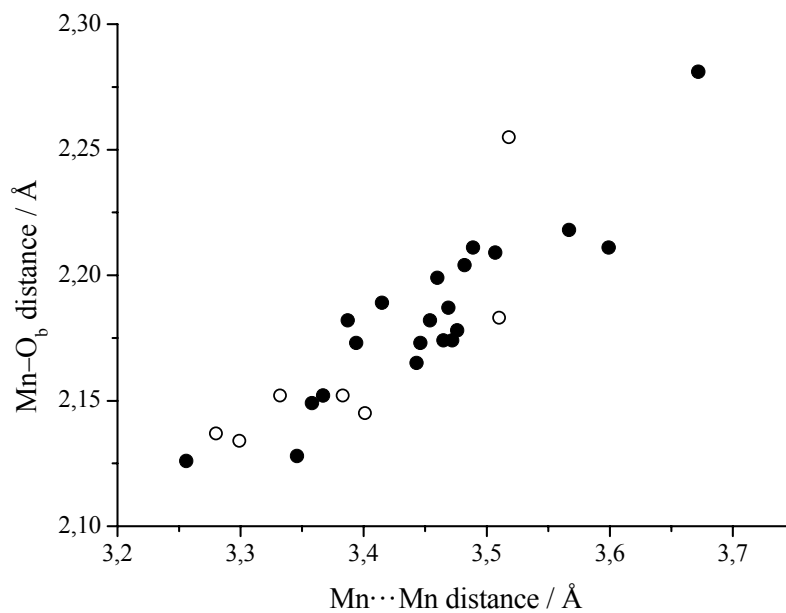

Supplement: c0dt00902d.pdf [file c0dt00902d.pdf]
